# Supplementary material for: Unraveling Regulation of the Small Heat Shock Proteins by the Heat Shock Factor HvHsfB2c in Barley: Its Implications in Drought Stress Response and Seed Development
Source: PLoS One. 2014 Mar 4;9(3):e89125. doi: 10.1371/journal.pone.0089125 (PMC3942355; doi:10.1371/journal.pone.0089125)
Supplement: Figure S2 — Multiple alignment of different sub-classes of Hv sHsps. The conserved α- crystallin domain was labeled with dotted box. The defined consensus regions I and II are marked with underline below the sequences. Highly conserved and semi-conserved regions are shown in “*” and “.”, respectively. Small Hsp region specific to respective subclasses was labeled with thick boxes. The chloroplast localized proteins have transit sequences that are specific for organelle and is labeled with red colour. The conserved Arg is displayed in red colour in the β7 strand. The secondary structure assignments for all classes of HvsHsps were labeled above the sequences. The predicted β-strands depicted by thick lines above the alignment are based on their position in known secondary structure of Hsp16.9 from T. aestivum (van Montfort et al. 2001). The IXI/V motif in the C-terminal extension is shown in green. The SXXFD motif and interacting residues in the conserved alpha crystallin domain are in pink colour. Alignment was performed by using ClustalW (DNAstar) program. (PDF) [file pone.0089125.s002.pdf]

Figure S2

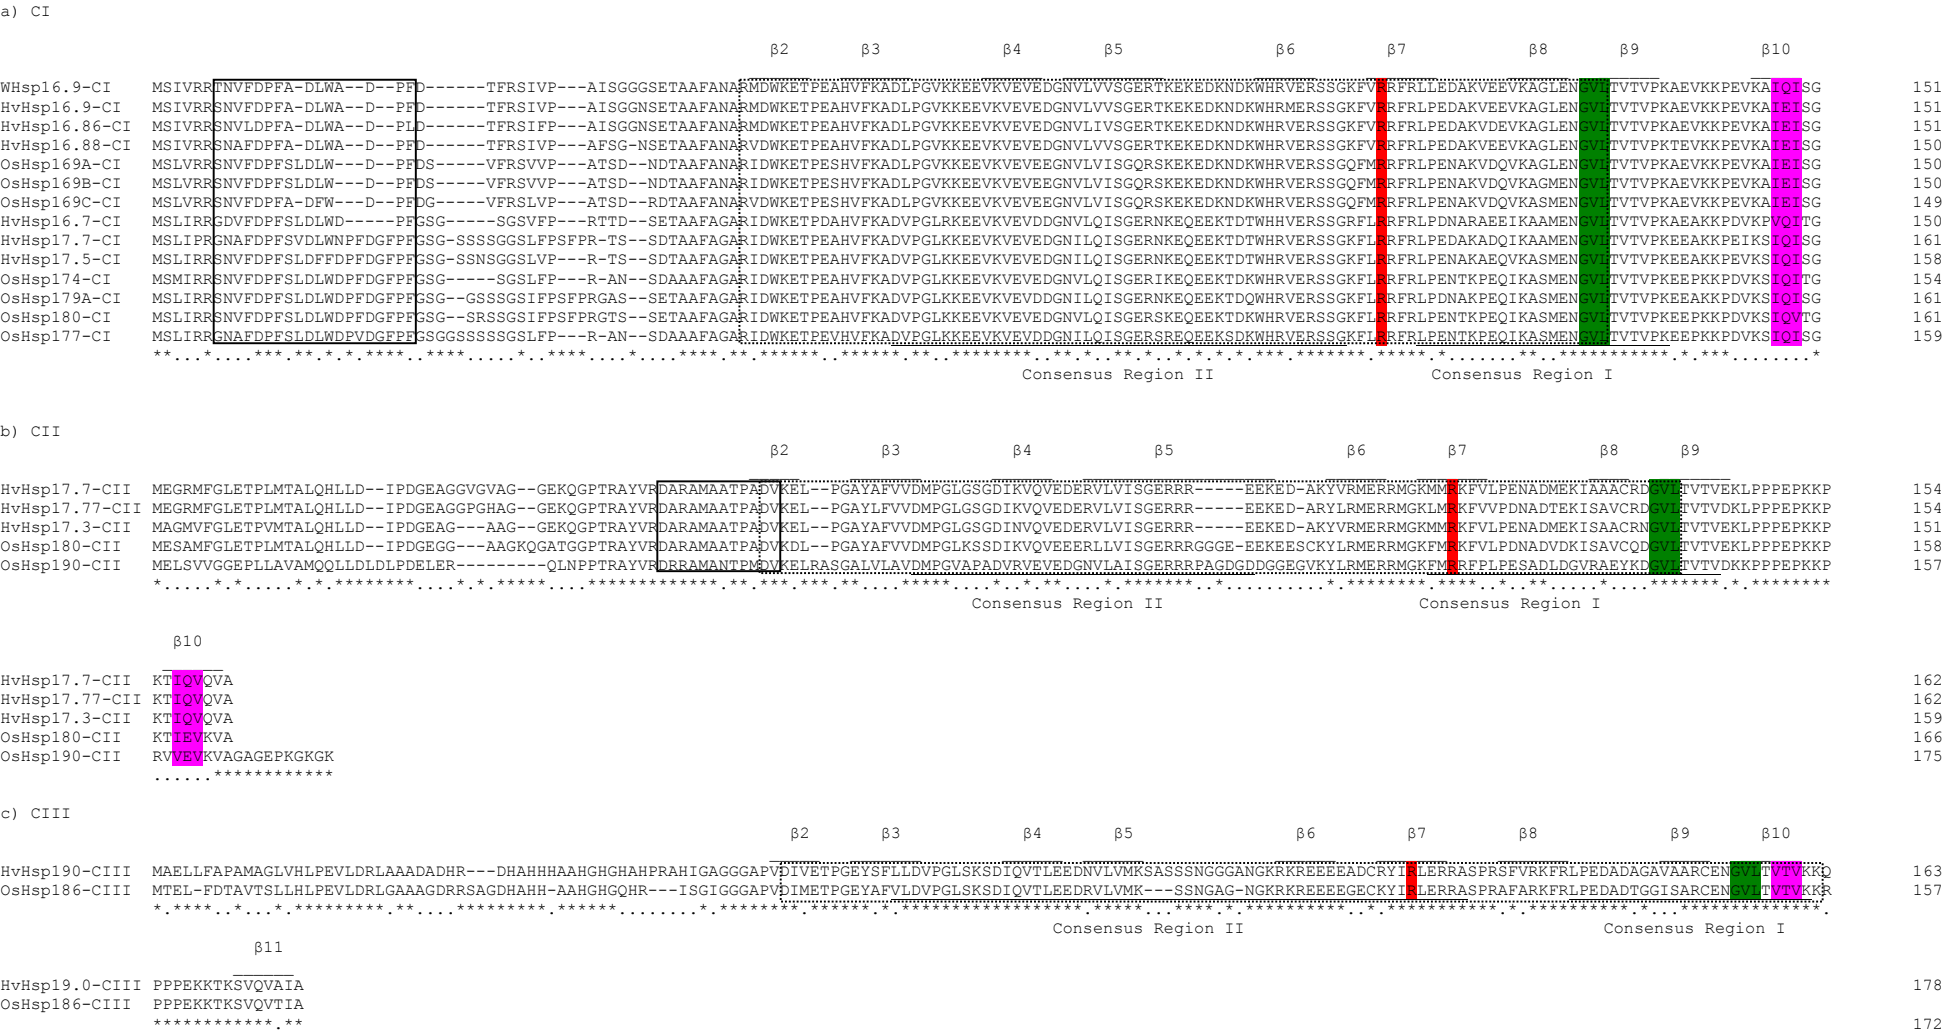

d) CV

β2β3β4β5β6β7β8β9

HvHsp17.1CV MD--YPMQ--EVQQHPGFR-AVHPWQWQWQ--LSVLASSSSPPAPSTRPP--NHVSWDETGAHHIYSADLPGVKKEEIRVEIEDGRYLVVRTELDAG---DAEVHGRRGGFAKFRFLPGMVDADGITAHEYAHKTVTVPRMHNRRARPMVNLIGSG----PAC148

OsHsp188-CV MDYYPMEEEEEEVHERPRFRFPVHPQWHHWQNLGLLSSSSPSPATAAAQRCSHVSWETATAAHLYSASLPGVKKEEIRVEVEDAMYLIVRTELDDGGGDDGGGGGGGRSFAKFRFLPAMVDADGISAEYTHKTVTVPRHLHTRARPVVNLAGGGGGGGGPAC166

\*\*\*\*\*

Consensus Region IIConsensus Region I

HvHsp17.1CV DPVARAA155

OsHsp188-CV DPVARAA173

\*\*\*\*\*

e) CIX

β2β3β4β5β6β7β8β9β10

HvHsp17.76-CIX MSMVRFLDTLALDSWNPFSGIFGTTASGGADAWLASDTTAFADTYIESRETAAAYVFSARLPAGVTKKEVRVEVEECKVLVIAGERTLRREKNETRHVVERSCATTFEGPHLEPDAALGVRAAMDDGGTQTTVTVPRVVG-----AAAAAEAMPEPAVAIE158

OsHsp179B-CIX MSLVKLFDTLAFDAWNPF-SIFGTTVA--ADAWLASDTSAFANTYIESRETAAAYVFRADLPAGVTKKEVRVEVDE-GNVILVIGERSVVRREKGGORSHHIERSCATTFEGPHLEPDDAVVDLVRASMDCG--MLTVTVPRVVTDKQPAIAAAAPVPAVVAPAVEAK160

\*\*\*\*\*

Consensus Region IIConsensus Region I

HvHsp17.76-CIX VVEASPC165

OsHsp179B-CIX AIEASP166

\*\*\*\*\*

f) CX

β2β3β4β5β6β7β8β9

HvHsp19.2-CX MSMISNMLGRRQPPPPQQQPPAGHKTNGHGGGGEVVEPVSIDILEPFMEAISLKAFGGP-----ALGLPFSTASMDWKEFTTAHVPMADVPGLRREVEVEVEEQRLRTSGQRARAEEDGGRWHRVERSEREVTVRLPENADVGGGVHAALDNKTTTI160

OsHsp188-CX MSMITSMGRKQN--AQKGGGGGGRTGGGGGGE-IEPVSDIMEPFMDAISLTAFAAAPSAAAAAGVP-STASMDWKETAATAHVPMADMPGVRRREVEVEVEEKKVLRTSGQRARAAEEKGERWHVERSEREVTVRLPPNANTDGVVHAALDNKTTTI160

\*\*\*\*\*

Consensus Region IIConsensus Region I

β10

HvHsp19.2-CX PKDDGKKAYGRIIPTN177

OsHsp188-CX PKDNDRKPHARIIPTN177

\*\*\*\*\*

g) Px

β2β3β4β5β6β7β8β9β10

HvHsp15.1-Px MADLFFGGSPFRRLLYARPL-----ASAPGSMDWVETQTSHVLRINVEGLKDDVKVQVEDGNVLSVRGAKEKTKEGN-----EDAVVHVSRGKPEFAEVFLFEHVVRVDQTRASVDNKTWVVEKEPAPARPRTRPTIVSSKL138

OsHsp160-Px MADLFFGG-PFRRLYGRPFPPDWASASATAASMDWVETPTSHVLRINVEGLKDDVKVQVEDGNVLTVRGAAPHAAAEKEREREKDVVWHVAERGRPEFAEVALPAEVRVEQTRASVDNKTWVVEKEPAPARPRTRPTIVSSKL146

\*\*\*\*\*

Consensus Region IIConsensus Region I

h) M

|               |                                                                                                                                                                       | β2 | β3 |                    |    |    |     |
|---------------|-----------------------------------------------------------------------------------------------------------------------------------------------------------------------|----|----|--------------------|----|----|-----|
| HvHsp21.3-MI  | --MASAVACKGATPASFLK-----SGAPVAFCLN-----TTAVTADHRPYNTLVKEAIRYD--DD-----DDYS---GRHLVLPSSFFSQ-DVLDPLG-----AHQTGLS--CTAGASRLGR-WVTEKEDDGAVYLKVF                           |    |    | 107                |    |    |     |
| OsHsp24.0-MI  | --MASIVASKRIPLFRLVEQLLAA-----SPAQGAASALR-----PVAVAGGSRAYNTG-AQLRRHER-DESDDDSGRGYDTRRPTRDATMPAFFSGNVFRDPFSAPOSLGRLLSLMDD----LATPAGRAG---AATLRRG--WNAKESEEALHLRVD       |    |    | 136                |    |    |     |
| OsHsp26.2-MI  | --MASTVALKGRPLATLLRQLLAADAPPAATGRPVAAAPASGKPVTPAAPAATATNAASRRLYNTGAPLRRYDVVDESGTDSGDEYDATDDGRRLTVPFFSSASDVLDPFGAPTSLGRLLALMEDAAVATAAAPGTNGLATAAARRGGW-WNAKEDDDAVHLKVS |    |    | 163                |    |    |     |
| OsHsp23.6-MII | MALARQCLSKRLAAGCALARPLH-----AASPVAANAAN-----SHGPLNFRALFSSAGADAAATT--GGCAPAKGDHGREVAVVDRSRRRWPNR-DLRDFVP-----LR----LVDGIGSALSQVAETLTRPLTGKVRDEERYRLREF                 |    |    | 129                |    |    |     |
|               | .....*.....*.....*.....*.....*.....*.....*.....*.....*.....*.....*.....*.....*.....*.....*.....*.....*.....*.....*                                                    |    |    |                    |    |    |     |
|               | β4                                                                                                                                                                    | β5 | β6 | β7                 | β8 | β9 |     |
| HvHsp21.3-MI  | MPGLTKEHVQVRADKNILVIKGE-----GEKQFWAGDDDSAVPRYNHRIEIPADAYKMDKIKAEKNGMLWVTLTKKEEERKDVFHVKVE                                                                             |    |    |                    |    |    | 193 |
| OsHsp24.0-MI  | MPGLGKEHVKVWAEQNSLVIKGE-----GEKEA-GEDEGAAPARYSGRIELAPEVYRMDQIKAEKNGVLKVVPKVKEEQRRDVFQNVVE                                                                             |    |    |                    |    |    | 221 |
| OsHsp26.2-MI  | MPGLGKEHVKVWAEQNSLVIKGE-----GEKDP-EDDADAAPPYTRRIELPADAFKMDKIKAEKNGVLRVAVPKLKEEERKDVFOVNVVE                                                                            |    |    |                    |    |    | 248 |
| OsHsp23.6-MII | IVPGLGKDDVRVYVDDGVLAIHGEKRDVVEEDRGDRDGDGECWAAATYHAGLLLPEDAVAEG-ITAEVRDGVLIHVTVPSS-PERKRSVTEVKVR                                                                       |    |    |                    |    |    | 219 |
|               | .....*.....*.....*.....*.....*.....*.....*.....*.....*.....*.....*.....*.....*.....*.....*.....*.....*.....*.....*                                                    |    |    |                    |    |    |     |
|               | Consensus Region II                                                                                                                                                   |    |    | Consensus Region I |    |    |     |

i) ER

|              |                                                                                                                                                                | β2 | β3  | β4 | β5 | β6 | β7 |     |
|--------------|----------------------------------------------------------------------------------------------------------------------------------------------------------------|----|-----|----|----|----|----|-----|
| HvHsp-ER     | -----NDQPHF-----WTK-ERSIGDFQTFSTARVD                                                                                                                           |    |     |    |    |    |    | 27  |
| HvHsp21.9-ER | MAAVSK---ALVATAVLALAVLAPPVAGLVPGVSSG-----LWDLDDPFVRLEQAPLAVQRPASAGDPAASVSSPMALARCDWKETPDHAVISLDVPGVRRDDVKVEEEN-RVLRVSGERK---ADEEKEGER---WHRAERAAGRFWRFRMPAGAD  |    |     |    |    |    |    | 147 |
| OsHsp232-ER  | MASMRATAAAAMLACIAVVLASTAADGALLPWFGGGGARDEAVPELGLLAADPFRILEHVVPFGFDR-----DDVAMLMAKRVWRETGDAHEVVVDVPGMRKEDLRVEEDN-RVLRISGERRREETTEQKGGD---HWHREERSYGRFWQLRLPDNAD |    |     |    |    |    |    | 153 |
| OsHsp218-ER  | MAAVAEREVLGMVAVAAMVMMAPPAALVPYGYG-----YMLDDPFVRLEQSLRPAG-GVAAAAAGEPAVALARCDWKETPEAHVVTVDVPGVRRGDVRVEVDEASRVLRVSGERRRAGAAEEEEGERDGVRRWHRAERAAGRFWRFRMPAGAD      |    |     |    |    |    |    | 153 |
|              | **.....*.....*.....*.....*.....*.....*.....*.....*.....*.....*.....*.....*.....*.....*.....*.....*.....*.....*.....*                                           |    |     |    |    |    |    |     |
|              | β8                                                                                                                                                             | β9 | β10 |    |    |    |    |     |
| HvHsp-ER     | QDSVRSASIKNGVLGVVVPKPAAPTPKKIR                                                                                                                                 |    |     |    |    |    |    | 56  |
| HvHsp21.9-ER | VERVTARLEDGVLTVTVPKIAEHQRREPRVINIAGEASNNGGK---GAGAGA EVTSSKSEMM                                                                                                |    |     |    |    |    |    | 206 |
| OsHsp232-ER  | LDLSIAASLDNGVLTVRFRKLAPDQIKGPRVGTASAGGDDGKKSIGGAGEGQNGQAKKVEL                                                                                                  |    |     |    |    |    |    | 215 |
| OsHsp218-ER  | VGRVAARLDDGVLTVTVPKVPGHGRGREPRVVAIDG----AGA---GDMEA EVVKASKAEM                                                                                                 |    |     |    |    |    |    | 206 |
|              | .....*.....*.....*.....*.....*.....*.....*.....*.....*.....*.....*.....*.....*.....*.....*.....*.....*.....*.....*                                             |    |     |    |    |    |    |     |
|              | Consensus Region I                                                                                                                                             |    |     |    |    |    |    |     |

j) P

|             |                                                      | β2                                      |                                    | β3                      | β4                 |                          |                          |     |
|-------------|------------------------------------------------------|-----------------------------------------|------------------------------------|-------------------------|--------------------|--------------------------|--------------------------|-----|
| HvHsp26.8-P | MAAATAFFALVSRLSPAARLPPIR-AWRAARPAP--LWTGRTRPLSVASAAQ | ENTD-SSVDVQVSQDRNAGNQGNVQRRPRRAAGFD-ISF | FGLVDPMSPMRTMKQMLDTMDRLF           | DD-AVGFP                | TAGRSPAAAAGEMPMPWQ | SIMEDDKVEVMRFDMPGLSREEVK | 160                      |     |
| OsHsp26.7-P | MAAPFALVSRVSPAARLPPIRAAWRRARPVGLPSSGRARQLAVASAAQ     | ENRDN                                   | TAVDVHVNQD--GGNQGNVQRRPRRSSALDGISF | GLVDPMSPMRTMKQMLDTMDRLF | DDVALGF            | PATPRR-SLATGEV-RMPWQ     | SIMEDDKVEVMRFDMPGLSREEVK | 159 |
|             | .....*                                               | .....*                                  | .....*                             | .....*                  | .....*             | .....*                   | .....*                   |     |
|             | β5                                                   | β6                                      | β7                                 | β8                      | β9                 | β10                      |                          |     |
| HvHsp26.8-P | VVMVEDDALVIRGEHKKKEAGEGQGEAGGSGDWKKE                 | SVSSYDMRLALPDECDKSKVRAELKNGVLLVTVPK     | RETERKVIDVQVQ                      |                         |                    |                          | 244                      |     |
| OsHsp26.7-P | VVMVEDDALVIRGEHKKKEEGEG--AEGSGDGWKK                  | SVSSYDMRLALPDECDKSKVRAELKNGVLLVTVPK     | REVERKVIDVQVQ                      |                         |                    |                          | 240                      |     |
|             | .....*                                               | .....*                                  | .....*                             | .....*                  | .....*             | .....*                   | .....*                   |     |
|             | Consensus Region II                                  |                                         |                                    | Consensus Region I      |                    |                          |                          |     |
