# Supplementary material for: Unraveling Regulation of the Small Heat Shock Proteins by the Heat Shock Factor HvHsfB2c in Barley: Its Implications in Drought Stress Response and Seed Development
Source: PubMed Central journal article supplement (PMC3942355; doi:10.1371/journal.pone.0089125), 2014-03-04
Supplement: pone.0089125.s001.pdf [file pone.0089125.s001.pdf]

Figure S1

a)

|          |                                                                                                                                                        | α1 | β1 | β2 | α2 |  | α3 | β3 |     |
|----------|--------------------------------------------------------------------------------------------------------------------------------------------------------|----|----|----|----|--|----|----|-----|
| HvHsfA1a | MEGGVALASS---VTTAVAPP-----GQGAG-----APP-----PFLMKTYDMVDDPATDAVSWG-PASNSFIVWNTPEFARDLLPKYFKH-----SNFSS---FVRQLNTYGFRRKVD                                |    |    |    |    |  |    |    | 92  |
| OsHsfA1a | MEAAVAAAAAAGAVTTAVAPP-----PGAAVSNG-----VATAPP-----PFLMKTYEMVDDPATDAVSWG-PGNNSFVWVNTPEFARDLLPKYFKH-----SNFSS---FVRQLNTYGFRRKVD                          |    |    |    |    |  |    |    | 102 |
| HvHsfA2a | -----MDPFH---GIVKEEEDFAGAAAADGYSPPSSWGSSPSSWGSSVWVGGA-----LAE LPRPMDGLGEAGTPFLNKTIEVVDHSDTIVSWG-VAGNSFVWVDAHAFSMVLLPRYFKH-----SNFSS---FVRQLNTYGFRRKVD  |    |    |    |    |  |    |    | 130 |
| OsHsfA2a | -----MNPLR---VIVKEEELDFAAAAA-----GE-G-SPSSWAVG-----VMDLPRPMEGLGEAGPPFLCKTYEVVDDPGTDTIVSWG-FAGNSFVWVDAHAFSAVLLPRYFKH-----SNFSS---FVRQLNTYGFRRKVD        |    |    |    |    |  |    |    | 118 |
| HvHsfA2b | -----MEDPVP---SLVKEEEE-----EG-----AHGR-----GGSPGVGA-----APRPMGLHDAAGPPFLTKTYDMVDDPNTDSVSWG-AGNSFVWVDPHFADATVLLPRHFKH-----SNFSS---FVRQLNTYGFRRKVD       |    |    |    |    |  |    |    | 108 |
| OsHsfA2b | -----MDDPML---NAVKEEES-----HGDGGGLEV-VAGE-----DGAATAVAA-----GVAPRPMGLHDAAGPPFLTKTYDMVDDAGTDAVSWG-ATNSFVWVDPHFADATVLLPRHFKH-----SNFSS---FVRQLNTYGFRRKVD |    |    |    |    |  |    |    | 117 |
| HvHsfA2c | -----MDAAVP---DGIVKEEGLLLLHEERPPAAG-PPQR-----QRQEDGA-----LPRPMEGLHEAGPPFLTKTYDLVEDPATDGVSWG-RAGNSFVWVDPHFADALLPRHFKH-----SNFSS---FVRQLNTYGFRRKVD       |    |    |    |    |  |    |    | 120 |
| OsHsfA2c | -----MDPAA---AGIVKEE---MLESQ-----QQ-----QRQEDGGA-----APRPMGLHEVGPFLTKTYDLVEDPATDGVSWG-RAGNSFVWVDPHFADALLPRHFKH-----SNFSS---FVRQLNTYGFRRKVD             |    |    |    |    |  |    |    | 107 |
| HvHsfA2d | -----MEKMM---PGMVKEE-----WP-----PSSPEEGE-----APRPMGLHEVGPFLTKTFDLVADPATDGVSWG-RAGNSFVWVDPHFVAAVFLPRFFKHNNFSSFVRQLNTYFLVRTNLYLNKRSHFYSLRFQGFRRKID       |    |    |    |    |  |    |    | 17  |
| OsHsfA2d | -----MEKMM---PGMVKEE-----WP-----PSSPEEGE-----APRPMGLHEVGPFLTKTFDLVADPATDGVSWG-RAGNSFVWVDPHFVAAVFLPRFFKHNNFSSFVRQLNTYFLVRTNLYLNKRSHFYSLRFQGFRRKID       |    |    |    |    |  |    |    | 122 |
| HvHsfA2e | MGSAAAMSHRMM---NPVKVEGR-----PSP-----SPSP-----TAAAGGGG-----G-APRPMGLADAGTPFLAKTYDMVDDPTTDAVSWG-ATNSFVWVDPHFLGTVLLPRYFKH-----SNFSS---FVRQLNTYGFRRKVD     |    |    |    |    |  |    |    | 116 |
| OsHsfA2e | -----MNYRVV---NPVKVESG---PS-----TGVANQG-----PPRPMGLADGGPPFLTKTYDMVDDPTTDAVSWG-ATNSFVWVDPHFLGNVLLPRYFKH-----SNFSS---FVRQLNTYGFRRKVD                     |    |    |    |    |  |    |    | 103 |
| HvHsfA2f | -----MDSAAMTMDIKQEPEMMVLD-----DD-----DDAGCCL-----APTPLDAAAANVAPFLAKTFDMVEDPATDAVSWG-AARNFVWVDPHFADATVLLPRHFKH-----SNFSS---FVRQLNTYGFRRKVD              |    |    |    |    |  |    |    | 112 |
| OsHsfA2f | -----MDYS---TVKQEEVEVVLDG-----EE-----EAAAAAAP-----VPLPAAMGVAAVAPFLVKTIFEMVEDPATDAVSWGGAARNFVWVDPHFADATVLLPRHFKH-----SNFSS---FVRQLNTYGFRRKVD            |    |    |    |    |  |    |    | 109 |
| HvHsfA4b | -----ME-----GGSSSLPFLTKTYEMVDEPATDAVVAWTPS-GTSEFVVSQADFCRDLPLKYFKH-----SNFSS---FVRQLNTYGFRRKVD                                                         |    |    |    |    |  |    |    | 77  |
| OsHsfA4b | -----ME-----GGSSSLPFLSKTYEMVDDPSTDAVVGWTPA-GTSEFVVAQPEFCRDLPLKYFKH-----SNFSS---FVRQLNTYGFRRKVD                                                         |    |    |    |    |  |    |    | 77  |
| HvHsfA4d | -----MEME-----GSSQGAAPFLTKTYEMVEDPATSRVSWGPG-GASEFVWVNPDPFSRDLPLKYFKH-----SNFSS---FVRQLNTYGFRRKVD                                                      |    |    |    |    |  |    |    | 79  |
| OsHsfA4d | -----MESS-----NL-----G-GGG-----GGGGGGPPFLTKTYEMVEDAATNHVSWGPG-GASEFVWVNPDPFSRDLPLKYFKH-----SNFSS---FVRQLNTYGFRRKVD                                     |    |    |    |    |  |    |    | 85  |
| HvHsfA5  | -----MEAS-----GA-----A-GA-----RGGGGGPPFLTKTYEMVDDPATDAVSWSDASDAFVWVNSPEFAARLLPAYFKH-----SNFSS---FVRQLNTYGFRRKVD                                        |    |    |    |    |  |    |    | 85  |
| OsHsfA5  | -----MEVA-----AG-----ARGGG-----AGGGGGPPAPFLTKTYEMVDDPSTDAVSWSDASDAFVWVNSPEFAARLLPAYFKH-----SNFSS---FVRQLNTYGFRRKVD                                     |    |    |    |    |  |    |    | 87  |
| HvHsfA9  | -----SARGAP-----VG-----AVPKPPVAPFLTKVYDMVSDAATDRVSWG-DAGNSFVWVDAHAFERDILLRHHFKH-----SNFSS---FVRQLNTYGFRRKVD                                            |    |    |    |    |  |    |    | 83  |
| OsHsfA9  | MGSKRS PQH-----PAAAAAPP-----PAVGGGGGVEVSGDGGASTANGPVVPKPSEVAPFLTKVYDMVSDPATDNIWSA-EGGGSFVWVDSHAFERDILLRHHFKH-----SNFTS---FVRQLNTYGFRRKVD               |    |    |    |    |  |    |    | 114 |

DBD

|          | β4                                                                                                                                               | HR-A-Core | Insert | HR B | NLS       |                                            |     |
|----------|--------------------------------------------------------------------------------------------------------------------------------------------------|-----------|--------|------|-----------|--------------------------------------------|-----|
| HvHsfA1a | PDKWEFANEGFLRGQKHLKTIKRRKFLH-----ANNQVQVQQQHQQQHQQQPQLQNAIPSCVEVGK-FG-MEEIEIMLKRDKNVLMQELVRLRQQQQTTHDQLQTLGKRLHGMEQRQQMMMSFLAKAMQSPGFLAQFVQQNENS |           |        |      | K--RR---- | IVAANKK                                    | 242 |
| OsHsfA1a | PDRWEFANEGFLRGQKHLKTIKRRKFLH-----GNNQVQ-----QPQLPAAPVPACVEVGK-FG-MEEIEIMLKRDKNVLMQELVRLRQQQQTTHDQLQTLGKRLQGMEQRQQMMMSFLAKAMHSPGFLAQFVQQNENS      |           |        |      | R--RR---- | IVASNKK                                    | 240 |
| HvHsfA2a | PDRWEFAAEGFLRGQKELLKTIKRRRFLH-----QSSGTFG-----QQQQQGGG---VCLEVGH-FG-HDGEVQQLKRDKGTLIAEVVKLRQQEQATRVQMQAMEARLAATEQKQQQMTVFLARAMKSPSFLQMLVERQD     |           |        |      | Q--SR     | RKELADALLS-KKR                             | 269 |
| OsHsfA2a | PDRWEFANEGFLRGKELKTIKRRRFPSSPSSSSSSSSSS-----HQQQQFAA---ACLEVGQ-FG-RDGVNRLQRDKSVLIAEVVKLRQQEQATRAQMAMEERISAAEQKQQQMTVFLARAMKSPGFLQMLVDRQAGHGA     |           |        |      |           | RNRVLEDALS-KKR                             | 267 |
| HvHsfA2b | PDRWEFANEGFLRGQRHLLKTIKRRKFLH-----PAHTA-----SNQQ-SLG---SYLEVGH-FG-NDAEIDRLKRDQQLLMAEVVKLRQQEQNTKAHLKAMEDRLRGTEQKQQQMTSFMARVLRNPEFLKQLISRNG       |           |        |      |           | MRKELHEAIS-KKR                             | 241 |
| OsHsfA2b | PDRWEFANENFLRGQRHLLKTIKRRKFLH-----PSHTA-----SNQQ-SLG---PYLEVGH-FG-YDAEIDRLKRDQQLLMAEVVKLRQQEQNTKANLKAMEDRLRGTEQKQQQMMMAFLARVMKNPEFLKQLMSQNE      |           |        |      |           | MRKELQDAIS-KKR                             | 250 |
| HvHsfA2c | PDRWEFANEGFLRGQRHLLKTIKRRKFLH-----PSNAP-----PSQQQALT---SCLEVGE-FG-FEEEIDRLKRDKNLLITEVVKLRQQEQATKDNVQAMENRQAEEKQQAQMMGFLARAMRNPFLFQQLVQR          |           |        |      | QD----    | KRKELEDAIS-KKR                             | 254 |
| OsHsfA2c | PDRWEFANEGFLRGQRHLLKTIKRRKFLH-----PSNAP-----PSQQQSLT---SCLEVGE-FG-FEEEIDRLKRDKNLLITEVVKLRQQEQATKDHVKMAEDRLRAAEQKQVQMMGFLARAMRNPFEFQQLAQ          |           |        |      | KE----    | KRKELEDAIS-KKR                             | 241 |
| HvHsfA2d | PDRWEFANEGFIRGQRLLKTIKRRRFLH-----LSYLP-----SSQQQALG---SCLEVGQ-FG-FDDEIEVLKRDKNALLSEVVKLRQQEQSTRADMRAMEERLHRAEQKQLQMMGFLARAIQNPDFFLQLVQQD         |           |        |      |           | KLKLEDLPPY-TRK                             | 151 |
| OsHsfA2d | PDRWEFANDGFLRGQRHLLKTIKRRRFLH-----LSYLP-----GSQQ-ALG---TCLEVGQ-FG-LDEEIDRLKRDKNLLIAEVVKLRHQQQSTRKANRAMEERLQHAEQKQVQMMGFLARAMQNPDFFHQLIHQQD       |           |        |      |           | KMKGLEDTFS-KKR                             | 255 |
| HvHsfA2e | PDRWEFANEGFLRGQRHLLKTIKRRKFLH-----T-HGS-----QNQQ-SLG---SYLEVGN-FG-HDVEIDQLKRDQQLLMAEVVKLRQQEQNTRSDLQAMEKRLQGTQKQQQMMMSFLARVMQNPFLIRQLISQSE       |           |        |      |           | MRKELEDAIS-NKR                             | 248 |
| OsHsfA2e | PDKWEFANEGFLRGQKHLKSIKRRKFLH-----P-NSS-----PSQQ-SLG---SFLEVGH-FG-YEGEIDQLKRDKHLMAEVVKLRQQEQNTRSDLQAMEKRLQGTQKQQQHMMAFLSRVMNPEFIRQLFSQSE          |           |        |      |           | MRKELEEFVS-KKR                             | 235 |
| HvHsfA2f | PDRWEFANAGFLGGQRHLLKTIKRRRFLH-----GADTG-----RRPAAALSPPSCAEGAGGFGSVEGELERLRQREALKRELQAGLRQQVEARATLLDMERRVDTERRQEQCKAFLARAVRNPAFLANLARRND          |           |        |      |           | LAAPAPAVDGGKK                              | 251 |
| OsHsfA2f | ADRWEFANEDFLGGQRHLLKTIKRRRFLH-----GAGTG-----STTPRNVN---CGGGG-----EGEVERLRDKKALRELARLRRQQEQEARQLDMERRVDTERRQEQCTEFLARALRSPDVLNRIARRH              |           |        |      |           | AAA--VE--RK                                | 232 |
| HvHsfA4b | PERWEFANEDEFIRGQRHLLKTIKRRKFLH-----IFSHS-----SHT-QGAGPLADSERRD---YEEIEIERLKCNASLNQLER---KKTDMDSMKKALEDKLLAIEDQQRNLSISYVEIVKAPG                   |           |        |      |           | FLSS-----FIEQSDHHGKK                       | 199 |
| OsHsfA4b | PERWEFANEDEFIRGQRHLLKTIKRRKFLH-----IFSHS-----SHS-QGAGPLADNERKD---YEEIEIERLKSNAALSSELQNNITLKKLNMEKRMQALEEKLQVVEDQQRSLISYVREIVKAPG                 |           |        |      |           | FLSS-----FVQQDHHHKK                        | 202 |
| HvHsfA4d | PERWEFANDDFIRGHMHLKTIKRRKFLH-----VHSHS-----LQN-QVNGPLAESERRE---YEDEISRLKHENSLVAELQKQAHQCCGIGWLMQSLDRLMVMQRQT                                     |           |        |      |           | DVSSVRDILQRRRGAHHPGQTM-----LELEPTDRFSKK    | 211 |
| OsHsfA4d | PERWEFANEDEFIRGHTHLLKTIKRRKFLH-----VHSHS-----LQN-QINGPLAESERRE---LEEEINRLKYEKSLVADLQRNQQQQVINWQMQAMEGRVLAEMEQRQKNIVASLCEMLQRRGGAVSS              |           |        |      |           | -----LLESDFHSKK                            | 211 |
| HvHsfA5  | PERWEFEGNEYFVIRGQRHLLKTIKRRKFLH-----IHSHS-----HQ-----PAAQSDNERSF---FEDEIDRLAREKANLQAEWKPKQEQEPGTMQIEALEARRAVDMEQRQKMI AFLQQAASKNPHFVSKLVKMAE     |           |        |      |           | -----ASSMFADALHKK                          | 214 |
| OsHsfA5  | PERWEFANEYFIRGQRHLLKTIKRRKFLH-----IHSHS-----HP-----PGALPDNERAI---FEDEIERLSREKSNLQADLWKSQQQSGTMNIQIEDLERRVLGMEQRQT                                |           |        |      |           | KMIAFLQQAASKNPHFVSKLVKMAE-----ASSIFDPAFNKK | 216 |
| HvHsfA9  | PERWEFANEFLRGQRHLLKTIKRRKFLH-----QEASRE-----LEKAPVKASPGTENIEIGR-YGGLVKEVETLRDKKALLMQQLVDLRHYQQSNDMSKLIQRLQLMEQNKQMMALLAIVVQNPSSLNQLVQQQQQ        |           |        |      |           | QD---RRNSWR-YEDGNKK                        | 227 |
| OsHsfA9  | PDRWEFANEFGIMQKHLKTIKRRKFLH-----QESPSE-----IQKAPVKTAPGTENIEIGK-YGGLKEVETLRDKKALLMQQLVDLRHYQQTNSLEVQNIERLQVMEQNKQMMALLAIVVQNPSPFLNQLVQQQQQ        |           |        |      |           | QD---RRSNW-SPDGSKK                         | 258 |

|          |                                                                                                                                                                                    |     |
|----------|------------------------------------------------------------------------------------------------------------------------------------------------------------------------------------|-----|
| HvHsfA1a | <b>RRLPK</b> QDDG--LN-----PESALLDGGIKYQPMINEAAKAMLRKILQDDTSPHRFESMGNSDNLLLENMPSAQTFDSSSSTRNSA-----VTLAEVPGNS-----GMPYMTSSGL-----SAICSSSSPPEMQCPVLD-----                            | 362 |
| OsHsfA1a | <b>RRLPK</b> QDGS--LD-----SESASLDGQIVKYQPMINEAAKAMLRKILKLDSS-HRFESMGNSDNFLENYMPNGQLDSSSSTRNSG-----VTLAEVPANS-----GLPYVATSSGL-----SAICSTSTP-QIQCPVLD-----                           | 358 |
| HvHsfA2a | <b>GRPIEYLLPR</b> -NG-----ETCYS-AAAQYGHGL-----VD-----GGEGRRADGED <b>ESFWK</b> -----                                                                                                | 315 |
| OsHsfA2a | <b>RRPIEYLLPR</b> -NG-----ETCAAGESAAMLAADGV-----AEPDG-----DT-----TPRGDGGGGGGDT <b>ESFWM</b> -----                                                                                  | 322 |
| HvHsfA2b | <b>RRRIDGQPE</b> --AY-----DVGAS-SSSLEQESPVV-----FDSHGSVELLADVSPVELLADGIPPLEGVS-----ELLADGIPPLEGVSALLADGIPPLEGVS-----ELLVDG-IPSDLGGSGIDA-----                                       | 348 |
| OsHsfA2b | <b>RRRIDQGPE</b> --VD-----DVGTS-SS-IEQESPAL-----FDPQ-----E-----SV-----EFLIDG-IPSDLENSAMDA-----                                                                                     | 301 |
| HvHsfA2c | <b>RRPIDNVFFY</b> -GS-----GVVTS-QS-EQLDSQFL-----FDSG-----VL-----SDPCTRLENLAQNI-----                                                                                                | 302 |
| OsHsfA2c | <b>RRPIDNVFFY</b> -DP-----GE-TS-QT-EQLESPYL-----FDSG-----VL-----NEL-SEPGIPELENLAVNI-----                                                                                           | 291 |
| HvHsfA2d | <b>RRSINVMPFL</b> -GP-----EG-TS-QS-EQLESTFI-----FEDR-----EF-----SELENLAMNI-----                                                                                                    | 193 |
| OsHsfA2d | <b>TRSIDIVPFL</b> -NP-----GE-VS-QG-DQLESTLL-----FDPR-----AELNDEPAKSELENLALNI-----                                                                                                  | 306 |
| HvHsfA2e | <b>RRRIDQGPEA</b> -VD-----SMGTG-ST-LEQGSVHM-----FEQQ-----E-----PV-----DSFVNG-VISDLESSSVDT-----                                                                                     | 300 |
| OsHsfA2e | <b>RRRIDQGPE</b> --LD-----SMGTG-SS-PEQVSQVM-----FEPH-----D-----PV-----DSLFGV-VPSDLESSSVEA-----                                                                                     | 286 |
| HvHsfA2f | <b>RRRLDAIPSLPA</b> -----EDGFTFEE-LALAAGVV-----EEA-----AAPTQGSAGGVTT <b>DMIWY</b> -----                                                                                            | 302 |
| OsHsfA2f | <b>RRRMLAAAAD</b> -----DDGLTFEA-LALAA-----AADTSHSTGGAVTT <b>DMIWY</b> -----                                                                                                        | 274 |
| HvHsfA4b | <b>RRLPKISIFHEGAS</b> -----TQGNQIMHCDLANSPAHKLYR-----ESFDKMESLNSLENFFKEAT-EALGNDISYDGDVPR---HSSAVVLTLELHSSGESDPHAQSPSPMMHTCSAGVGDSSHS-----SRDIAESASC-PESPPLPEAHSRADSRAK            | 337 |
| OsHsfA4b | <b>RRLPISIFHEDAN</b> -----TQENQIMPCDLTNSPAQTFYR-----ESFDKMESLNSLENFLREAS-EFEGNDISYDDGVFG---PSSTVVLTLELHSPGESDPRVSSPPTMRTSSAGAGDSSHS-----SRDVAESTSC-AESPPIQMHRSRVDTRAK              | 340 |
| HvHsfA4d | <b>RRVVK</b> IDLDFVE-----EQRVYYPRAIGDETPGMIQVN-----AEPFKMEMALVSLKLVQRA---AAATPTPSTDDPALG-----DLQAAPMEAGVNLEL-----SPPNIRHVHSPP---ELAVAESPGYAVQSPMLLFPDIQQDKHKT                      | 335 |
| OsHsfA4d | <b>RRVVK</b> MDLFDVDDCAAG--EEQKVQFQIGTDPAMPFVLP-----VTNGEAFDRVELSLVLEKLFQRAN-DACTAAEEMYSHGHHGTEPSTAICPEEMNTAPMETGIDLQLPASLHPSSPNTGNAHLHL---STELTESPGF-VQSPPELMAEIREDIHVT           | 362 |
| HvHsfA5  | <b>RRLSGLDYAVEATETASFCDDHSATSROEMGNLLNQHFSDK</b> -----LKLGLCPAETESNLITLSTQSSHEDNCSLHGRHPHGHGDMGTGCLPLVPQMMELSDTGTISICPSKSSFFRPVAVNDEGLSPCHLSLTLASCMSMDVDRGQASNADGSTTVN--KGSNDNPLE  | 372 |
| OsHsfA5  | <b>RRLPGLDYSIENTETTSFYDDHSSTSKQETGNLLNQHFSDK</b> -----LRLGLCPAMTESNIITLSTQSSNEDNRSFHGKHP-ECDDMMGRECLPLVPQMMELSDTGTISICPSKSSCFAPPISDEGLLTLCHLSLTLASCMSMDVDRGQASNADGSTTVN--KGSNDNPLE | 375 |
| HvHsfA9  | <b>RRFPALQGPVTD</b> -----QETSGAGAEIIQYRPPV-----P-----ETS-----S-----Q-----VIADE-----AYLSATAE-PISSPPLN-----                                                                          | 284 |
| OsHsfA9  | <b>RRFHALEQGPVTD</b> -----QETSGRGAHIVEYLPPV-----P-----ETS-----G-----Q-----VNFVEG-----AICSANSQ-PVPSPAVA-----                                                                        | 316 |

AHA-motif

|          |                                                                                                                                                                                 |     |
|----------|---------------------------------------------------------------------------------------------------------------------------------------------------------------------------------|-----|
| HvHsfA1a | -----SNSSTQLPNMSAVPSVPKA---MTPGLSD---ISIPGFPDLHDLITEDAINIPVENYAMPGPCIFPLPEGSDSVPMDDIDTDEIDDTQKLPGII <b>DSFWEQFLCAS</b> PLSVNDNEVDSGLLDTREAEQENGWTRTENLAN <b>LTEQMGLL</b> SSNHRG | 510 |
| OsHsfA1a | -----NGIPKEVPNMSAVPSVPKA---VAPGPTD---INILEFPDLQDVAEENVDIPGGGFEMPGEVFSLPPEEGDSDVPIETDEILYNDTQKLPAAII <b>DSFWEQFLVA</b> SPLSVNDNEVDSGLVDQKETQQNGWTKAENMAN <b>LTEQMGLL</b> SSHHTG  | 506 |
| HvHsfA2a | ----- <b>ELLSL</b> GLEER---QREA---GGGGGGE---AS---GAEVD---DDVD---DEMDE <b>LVQSLYHL</b> SPNRPHGHHHQ                                                                               | 371 |
| OsHsfA2a | ----- <b>QLLSL</b> GLEEK---QRED---GVAGGVQ---ESNSGGADVND---E---EDDD---DDVDV <b>LVQSIYHL</b> SPK                                                                                  | 376 |
| HvHsfA2b | -----NGV-TEPQDFGLGTCEPQQ---NRVP-GL---FR <b>DSFWEELLNK</b> GLS---DESD---EPVNVDDMDV <b>LSEKMGYL</b> IPNSPTQTT                                                                     | 418 |
| OsHsfA2b | -----GGL-VEPQDFDVGASEQQQ---IGPQ-GE---LN <b>DNFWEELLNE</b> GLVG---EEND---NPVVEDDMNV <b>LSEKMGYL</b> NSNGPTAGE                                                                    | 372 |
| HvHsfA2c | -----QDLGQKGTDE---GKKD---EANGQVE---LN <b>NEFWAELFSD</b> DFGD---GDGSLSE---LEGRRPEDIDE <b>LAQQLGYL</b> SSSTSPL                                                                    | 372 |
| OsHsfA2c | -----QDLGKGVDE---ERQN---QTNGQAE---LG <b>DDFWAELLVE</b> FTG---KEEQ---SE---LDG-KIDGIDE <b>LAQQLGYL</b> SSTSPK                                                                     | 358 |
| HvHsfA2d | -----QGIRKGMEDD---KGGRS---QCGEAE---LT <b>DDFWAELLSE</b> GMRD---EAEM---LE---LERRRSRYVDA                                                                                          | 248 |
| OsHsfA2d | -----QGLGKQDVNRTRNQPRN---QASNETE---LT <b>DDFWAELLNE</b> GARD---DAGI---PG---MERRRPRYVDA <b>LAQKLGYL</b> SNSSQK                                                                   | 379 |
| HvHsfA2e | -----KGA-EVQQSVASSRSEQLR---GRPS-GE---LN <b>DDFWEDLLHE</b> GGLG---EEAS---PG---NLVVPDDMN <b>LLAQEMH</b>                                                                           | 360 |
| OsHsfA2e | -----NGG-KAQQDVASSSSEHGK---IKPSNGE---LN <b>EDFWEDLLHE</b> GGLD---EDTR---NPAI---DDMN <b>LLSKMGYL</b> NSSSTKSPQ                                                                   | 357 |
| HvHsfA2f | ----- <b>ELLEGG</b> QAEID---VEVED---LVAAAG---DMAP---WE---FGEE---EDPDDGVCRDARRGRE                                                                                                | 350 |
| OsHsfA2f | ----- <b>ELIGEE</b> QAEID---IEVDQ---LVASASA---AADT-ASEAEP---WE---EMGE---EEVQE <b>LVQQIDCL</b> ASPSS                                                                             | 331 |
| HvHsfA4b | -----VSDIDVNLEPAVTEGSPSRDQQTQDPPAD---AN <b>DGFWQFLTE</b> QPGS---SDTHQEAQERRD---REANQTVTRDRGSFWWG-KSVEQMT <b>EKLGLI</b> TSAEKT                                                   | 432 |
| OsHsfA4b | -----VSEIDVNSEPAVTEGSPSRDQ-PAEPPAVTPG---AN <b>DGFWQFLTE</b> QPGS---SDAHQEAQERRDG---GNKVDEMRSGRQHLWWGKRNVQIT <b>EKLGLI</b> TSAEKT                                                | 440 |
| HvHsfA4d | -----MSEADLSSEAS---TTDTSQDETTAETGVPREPAVAAN <b>DLFWERFLV</b> TPKP---CCGYAFQESHESK---DDVKIGIDCNWYGHDRNDVQIT <b>QMGHL</b> ASAQKT                                                  | 431 |
| OsHsfA4d | RY---PTQADVNSEIAS-STDTSQD-GTSETEASHGP---TN <b>DFWVERFLTE</b> TPR---SCLDESEQRQESPK---DDVKAEKGCNGFHHREKVDQIT <b>QMGHL</b> ASAEQTLHT                                               | 459 |
| HvHsfA5  | AD---AAAMGNSQKASVDAG-TDATTTPREDTRVATEPAAP---VKAN <b>DNFWQFLTE</b> RPG---DASSGPRDP---S---MDKQTEGREKDDREA <b>TEQLKL</b>                                                           | 457 |
| OsHsfA5  | KDDTIDRSFDDNQKKSADSRADATTPRADARVASEAPAAPAAVVD <b>DKFWQFLTE</b> RPGC---SETEEASSGLRTPD---TSREQMENRQAYDHSRNDRED <b>VEQLKL</b>                                                      | 475 |
| HvHsfA9  | -----MPMDIDTETTSNDL-----NTQSSG---DIFADMPALPDFD---M---Q---LWFG---DGEL---TLTIQD-----Y <b>DESPQEQD</b> CQMEAQHNHNPNQYASR                                                           | 363 |
| OsHsfA9  | -----TPMDMQTSNVAD-----TLGSSE---EPFADNSTLHEWDDND---M---Q---LLFDDN---LDPILPPFENDG <b>QMGF</b> ---PLSVQD-----Y <b>D-FPQLBQD</b> CLMEAQYNSNPNQYADVITEA                              | 410 |

b)

|           |                                                            | α1           | β1              | β2    | α2       | α3           | β3     |             |
|-----------|------------------------------------------------------------|--------------|-----------------|-------|----------|--------------|--------|-------------|
| HvHs fB1  | --VIIK RAGMAGAAAAAQQQKGGGGV-----V-----MKGG--GGG            | PAPFLTKTQMV  | EERGTDEVISWGEH  | GRS   | FVWVWRP  | VELARDLLPLHF | KCNFSS | SFVRLNTYGF  |
| OsHs fB1  | -----MAAAEAAAAVGKQQKGGGG-----RGGG--GGG                     | PAPFLTKTNQMV | EESATDEVISWGEH  | GRS   | FVWVWRP  | VELARDLLPLHF | KCNFSS | SFVRLNTYGF  |
| HvHs fB2a | -----MASPAL---GAG-----                                     | TPPFLTKTYAM  | VDDPETDDTISWNES | GTAFV | VWRRAE   | FERDILLPKNF  | KHSNFS | ASFVRLNTYGF |
| OsHs fB2a | -----MASPA---AG-----                                       | TPPFLTKTYAM  | VDDPETDDTISWNDS | GTAFV | VWRRAE   | FERDILLPKNF  | KHSNFS | SFVRLNTYGF  |
| HvHs fB2b | -----MVSSGQICTVV---GGGG--VMGEQAAPVSCGETPAQAEVGTGVGQ---RSI  | PTPFLNKTYQLV | DDPAVDDVISWSED  | GS    | AFVWVWRP | AEFARDLLPKY  | FKHNNF | SFVRLNTYGF  |
| OsHs fB2b | -----MADQTAATAVVV---GGGAAATMGEPSPPPPA-PAAEAAGVGVGQQQ---RT  | PTPFLTKTYQLV | DDPAVDDVISWNDD  | GS    | TFVWVWRP | AEFARDLLPKY  | FKHNNF | SFVRLNTYGF  |
| HvHs fB2c | -----MAAEHGAAAAAV---DGAG-----AEP PPPAPMPGLAATAADAAGQ---RSI | PTPFLTKTYQLV | DDPAVDDVISWGED  | GS    | TFVWVWRP | AEFARDLLPKY  | FKHNNF | SFVRLNTYGF  |
| OsHs fB2c | -----MAEQGAGEADA---GGG-----EPPPAAVMT--AAAEALAGQ---RSI      | PTPFLTKTYQLV | DDPAVDDVISWNED  | GS    | TFVWVWRP | AEFARDLLPKY  | FKHNNF | SFVRLNTYGF  |
| HvHs fB4b | MAFLVERCGEMVVSMEGSGAHGGGG-----GGGGGVGKVP                   | PAPFLTKTYQLV | DDPCTDHVSWGED   | DATFV | VWRPE    | EFARDLLPNY   | FKHNNF | SFVRLNTYGF  |
| OsHs fB4b | MAFLVERCGEMVVSMEGMP--HGGGG-----AAAG--KVP                   | PAPFLTKTYQLV | DDPCTDHVSWGED   | DTFV  | VWRPE    | EFARDLLPNY   | FKHNNF | SFVRLNTYGF  |
| HvHs fB4c | ---MERC GSWSES DAAAQ-----AAAQ---KAV                        | PAPFLTKTYQLV | DDPATDHVSWGDDRV | STFV  | VWRPE    | EFARDLLPNY   | FKHNNF | SFVRLNTYGF  |
| OsHs fB4c | ---MERC GSWSDCEAAA-----AAAQ---KAV                          | PAPFLTKTYQLV | DDPATDHVSWGDDRV | STFV  | VWRPE    | EFARDLLPNY   | FKHNNF | SFVRLNTYGF  |

|           | β4                                                                                                                     |  |  |  |  |  |  |     |
|-----------|------------------------------------------------------------------------------------------------------------------------|--|--|--|--|--|--|-----|
| HvHs fB1  | WEFANENFRRGEQSLLSGTRRRRATT-----TTTTQSSKTCGTAVN-----VAFP-----PP---LPALPP-----ASASTSGTNDLSSS-----                        |  |  |  |  |  |  | 173 |
| OsHs fB1  | WEFANGNFRRGEQLLSGIRRRRATT-----PQSSKSCGSGVN-----VAFP-----PP---LPPLPP-----EPSATTSSGNDRSSS-----                           |  |  |  |  |  |  | 163 |
| HvHs fB2a | WEFANECFRKGEKQLLGAIQRRRSGS-----AGAPAPAMMATPIA-----TAIPISP---TP--TSSGGDP-----AVSSSPPLGLALVAT-----                       |  |  |  |  |  |  | 151 |
| OsHs fB2a | WEFANDCFRRGEKHLGGIQRRRGSG-----TGG-AGAAPAGGIP-----TAPISS---PP--TSSGGEF-----AVSSSPPRGAAGIAAGV-----                       |  |  |  |  |  |  | 150 |
| HvHs fB2b | WEFANDCFRRGEKRLLCDIHRRRVTPV-----AATAAVTVAAAAAIP-----VALPVTK-RQGSF--VLSGDEQ-----VLSSSSSPEPFLNQYAPSY----                 |  |  |  |  |  |  | 197 |
| OsHs fB2b | WEFANDCFRRGERLLCEIHRRRVTP-----PAPAATTAAVAAAIIP-----MALPVTTRDGSF--VLSGEEQ-----VISSSSSPEPPLVLPQAPSG----                  |  |  |  |  |  |  | 197 |
| HvHs fB2c | WEFANDCFRRGEKRLLCDIHRRRVQSA-----GLAAAAAAAAGAVTVAAAAAIP-----MALPVTTR--SGSELPQLSSEEQ-----VLSSNSGSAAELPLAPSGSGGSAP        |  |  |  |  |  |  | 205 |
| OsHs fB2c | WEFANDCFRRGEKRLLCDIHRRRVAAAAAAPPSPGMATAAAAVASGAVTVAAAIIP-----MALPVTTR--AGSF--AHSSEEQ-----VLSSNSGSAGEHRQA-SGSG-SAP      |  |  |  |  |  |  | 205 |
| HvHs fB4b | WEFANEFFRKGAKHLLAEIHRRRSS-----QPPPPSMVPHQAAAYH-----HHYHLG--NTFSQPQ---PPAAAAHHQHHP-----VYQQHFVQEEPAAAAA-----            |  |  |  |  |  |  | 192 |
| OsHs fB4b | WEFANEFFRKGAKHLLAEIHRRRSS-----QPPPP-PMHPQ--Y-----HHHHHL--NPSLPP---PPP---AYHHHH-----LIQEEPATTAHCTVAGD-----              |  |  |  |  |  |  | 178 |
| HvHs fB4c | WEFANEFFRKGKQLLCEIHRRRVTSGST-----T-SS-SPPFFAPPHFPLFH-PGVSVAHHHQQFVGEDGAMAAHAG-MGVPFMQPHWREQ---GAPRLLALGGPAAPSPGVE----- |  |  |  |  |  |  | 196 |
| OsHs fB4c | WEFANEFFRKGKQLLCEIHRRRVTSAS-----T-ASPSPPFFAPPHFPLFHHFVGVAAQHHHAFVGDGVAAGH--IGMFPFPQPHWREPNLVAATRLALGGPAAPSPSSAEAG----- |  |  |  |  |  |  | 201 |

|           | HR-A-Core                                         | Insert    | HR-B                       |                    |                |                  |                      |                        |           |           |      |           |          |     |
|-----------|---------------------------------------------------|-----------|----------------------------|--------------------|----------------|------------------|----------------------|------------------------|-----------|-----------|------|-----------|----------|-----|
| HvHs fB1  | ---SASSPTRPDLSSENEQLRKDNHALAAELAMARRHCEE          | LLGFLSRFL | DVRQL                      | ---DLR-----        |                |                  |                      | LLMDEDMQG-----AAGGARG  | 244       |           |      |           |          |     |
| OsHs fB1  | ---SASSPPRADITSENEQLRKDNQTLTLMELARARRHCEE         | LLGFLSRFL | DVRQL                      | ---DLR-----        |                |                  |                      | LLMQEDMRA-----AAGGVGGE | 234       |           |      |           |          |     |
| HvHs fB2a | ---GAMA---LLEENARLRRENARLARELARARRVCDGVRHLVWRYD   | QGGEE     | ---VGVED-----              | ER-----            |                |                  |                      | HGAAGGKP-----MLFGVAIGS | 222       |           |      |           |          |     |
| OsHs fB2a | ---SGAVA---ELEENARLRRENARLARELARARRVCDGVRRLVSRDYH | ---D---   | HGGGE                      | ---EE-----         |                |                  |                      | AGEGDVKP-----MLFGVAIGG | 219       |           |      |           |          |     |
| HvHs fB2b | ---SGSGGVASG-DLGEENLRRENSRLTRELGMKKLNNIFVLMISKY   | TDGQV     | ---DAANATSAATDADAGHCSGESAE | T-MPLP--           | PPVLELLP       | SCPSAPT          | ---AADLGADEEEKMSA    | RLFGVICIGR             | 317       |           |      |           |          |     |
| OsHs fB2b | ---SGSGGVASG-DVGDENERLRRENAQLARELSMRKLCNNILLMSKYA | STQQL     | ---DAANASSAAGNNNNNCSGESAE  | AATPLP--           | LPVLDLMP       | SCPGAAS          | ---AAPVSDNEEGMMSA    | KLFGVSIGR              | 318       |           |      |           |          |     |
| HvHs fB2c | GGAAAGSSSG-DMGEENRLRRDNARLTRELGMKKLNNIFVLSMFKF    | ASSQQ     | ---DGGPGS---               | LSSVNC             | SGES--         | ALAPPPLPAAILDLMP | SCSALAT              | ---AAGFAVDGGPDADA      | RLFGVSIGL | 322       |      |           |          |     |
| OsHs fB2c | GGGGGSASGGDMGEENERLRRENARLTRELGHMKKLNNILLMSKYA    | ATQHV     | ---EGSAG---                | ISSIANCS           | GESSEAVPPPPPLP | PAILDMP          | SCPALATAAAAAGLAIDGEP | DPISA                  | RLFGVSIGL | 327       |      |           |          |     |
| HvHs fB4b | ---ASHGGDFLAALSEDNRQLRRRNSVLLSELAHMKKLYNDI        | IYFQNHV   | VPVTS                      | ---PSSAASQR-----   | QHPLPGA        | -----GASNSCR     | LLELDMDVDRGSP        | -----AAEDDD            | 286       |           |      |           |          |     |
| OsHs fB4b | ---GGEGGDFLAALSEDNRQLRRRNSLLSELAHMKKLYNDI         | IYFQNHV   | VPVTTTTTTPS                | STAMAA             | -----AQHHL     | PLP-----         | AAASCR               | LMELSDPDHS             | PPPPP     | PKTPATDGG | 278  |           |          |     |
| HvHs fB4c | ---GNGRATSAAVLMDENERLRRNSNTALLQELSHMRKLYNDI       | IYFQNHV   | RPVAP                      | ---SPAAATFLQG----- | LGNMQP         | RKMP             | PATTGAGN             | LNTSGS                 | TSSSS     | LTIADELS  | PPPN | HLSAEKSSG | 312      |     |
| OsHs fB4c | ---GAGRAATAAVLMEENERLRRNSNTALLQELAHMRKLYNDI       | IYFQNHV   | RPVAP                      | ---SPAAAAFLQG----- | LG--MQA        | RKKF             | ---AAANV             | LNSG                   | STSS      | SLTIAE    | EPSP | PPQQL     | LAGEKSSG | 313 |

|          | NLS                                                                                                                               | NES |     |
|----------|-----------------------------------------------------------------------------------------------------------------------------------|-----|-----|
| HvHsfB1  | SADQEQCCEKK-----VKLFGVILKD---ASARKRGR-----CDEAAAGERSVKMTR---IGEP-----WVGVPSW-----PAR-----CGGN                                     |     | 308 |
| OsHsfB1  | QRVQEHAREEK-----VKLFGVLLDDTHGAATKKRAR-----CEEAASERPIKMIR---IGEP-----WVSVPSG-----PAR-----CGGN                                      |     | 302 |
| HvHsfB2a | KRSREDG--HEG-----GDEENGAEDGEDDEEEQE-----HNDDDERHAARRE---QGKSMR-TERSDLNVLSSLVRAAAAAAR-----PDGGSRLA                                 |     | 299 |
| OsHsfB2a | KRSRENGEDEE-----EEEEEGAEDGEDDEVEE-----DDEERERHAARRVPRREGKVRRTTELSDDLVLALSVRAAAAAAR-----PGGASRDRKSSVS                              |     | 305 |
| HvHsfB2b | KRMRHDGEDQSSR-----GAAEVKP-EPMDAQPSLDG-----HTTEVQTPWIYRPRP--AYHPLR--ASNGSNCSYSGS----DDH-----NGSSSR                                 |     | 390 |
| OsHsfB2b | KRMRHDGGGDDD-----HAATVKA-EPMDGRPHGKDE-----QSAETQAWPIYRPRP--VYQPIR--ACNGEYDRAG-----SDQ-----DGSNST                                  |     | 390 |
| HvHsfB2c | KRARDEEDEDVREE--RPNGDGDADVKEEAADRRPDGG-----SEERQSWPIYRPKP--VYR-----ACNGQDGAGAG-AGSGSDQ-----DRNSR                                  |     | 402 |
| OsHsfB2c | KRTRDDAAAAAEDDGGGEDQAEHGGADVKE-EEADPHPAGGGGSSTEASPEHPWPYRPTP--MYHAVR-PTCNGPDRAGSDQDGSSSSQTMGPGFEFDDLQKMMVVQQSNFVMHWGRSECGSGVRGFGW |     | 454 |
| HvHsfB4b | DT-----VKLFGVALHH---GKKKRAHG-----DD-----AVADHLGSEV                                                                                |     | 316 |
| OsHsfB4b | DT-----VKLFGVSLH---GRKKRAHR-----DD-----DGVHDQGSEV                                                                                 |     | 310 |
| HvHsfB4c | EAGSSAALS-AP-----TKLFGVHLSAAPVGAGSKRPPSP-----EELPSTPPATKAR---L--V---LESDDLSSLVAPP-----AQFCAASSPARS                                |     | 388 |
| OsHsfB4c | EAGNSAARSAP-----TKLFGVHLSAAPCGAGSKRASSP-----EE-HPPTSPATKPR---L--V---LECDLSSLTVAPSSSQ-----QQLSAASSPTSTS                            |     | 394 |

c)

|          | α1                       | β1                      | β2            | α2                | α3                | β3                    | β4                       |     |
|----------|--------------------------|-------------------------|---------------|-------------------|-------------------|-----------------------|--------------------------|-----|
| HvHsfC1a | -MDSLHTEALGLIGCGHGD--FC  | TAPFVAKTYQMVCDPRTDALVRW | GKGNNSFLVPD   | VAGFSQLLLPCFFKHG  | NFSSFVRQLNTY----- | GFRKVPDRWEFAHES       | FRLRGQTHLLPRIVRKKRGEAG   | 121 |
| OsHsfC1a | -MDGLHTEALGLIGCCGGDQQQ   | TAPFVAKTYQMVCDPRTDALVRW | GRDNNSFVVVDP  | AASFQQLLLPCFFKHG  | NFSSFVRQLNTYVSI   | IQSPAPGFRKVPDRWEFAHES | FRLRGQTHLLPRIVRKKRGEAG   | 132 |
| HvHsfC1b | -MGSECKGHQHQ--DDGG-----  | VAPFVAKTFHMSDPATDAVVCW  | GGASNTFLVLDPA | AASFDYLLPSYFKHRNF | ASFVRQLNTY-----   | GFRKVPDRWEFAHES       | FRLRGQAKLLPLIVRKKRAGAG   | 115 |
| OsHsfC1b | MMGGECKVHQLQAAGDGGPG--   | VAPFVAKTFHMSDPSTNAVVRW  | GGAGNTFLVLDPA | AASFDYLLPSYFKHRNF | ASFVRQLNTY-----   | GFRKVPDRWEFAHES       | FRLRGQAQLLPRIVRKKKGGAA   | 121 |
| HvHsfC2a | ----MSSAGG-----GM-----   | VAPFVAKTYDMVDDPATDSVVAW | GPASNSFVVADP  | FAFSEMLLPAHFKHANF | SFVRQLNTY-----    | GFRKVPDRWEFAHES       | FRLRGQTHLLPRIVR--RQSGG   | 106 |
| OsHsfC2a | ----MTTTAEG-----GGG----- | VAPFVAKTYRMVDDPATDGVIAW | GRDSNSFVVADP  | FAFSQTLPAHFKHSNF  | SFVRQLNTY-----    | GFRKVPDRWEFAHES       | FRLRGQTHLLRRIVRR--SSGG   | 108 |
| HvHsfC2b | ----MAAAASV-----GGG----- | AAPFVWKTYRMVDDPGTDGVI   | GWKGNNSFVVADP | FSQTLPAHFKHNNF    | SFVRQLNTY-----    | GFRKVPDRWEFAHES       | FRLRGQTHLLRNIIVRR--AVAGG | 111 |
| OsHsfC2b | ----MAAAG-----GG-----    | AAPFVWKTYRMVDDPGTDGVI   | GWKGNNSFVVADP | FSQTLPAHFKHNNF    | SFVRQLNTY-----    | GFRKVPDRWEFAHES       | FRLRGQTHLLRNIIVRR--AAAGG | 108 |

|          | HR-A-Core                                                                                                 | Insert | HR-B                                |     |
|----------|-----------------------------------------------------------------------------------------------------------|--------|-------------------------------------|-----|
| HvHsfC1a | VG---ASCSSAVG-GAEQHQHVVANMGDEVEEEEEEE-----ESEALLEEVQRLRKEQTAIGEQLARMSRRLQATERRPDLMSFLARLAE                |        | DPSATSLHLFEQAAEKQRMQFPSRDFTSPLIALPL | 240 |
| OsHsfC1a | GGGGGASCSFGGGAGEHQVAAAAASVMSGEEEDAED-----VLAKEAALFEVQRLRHEQTAIGEELARMSRRLQATERRPDLMSFLAKLAD               |        | DPNAVTHGLLEQAAERKRRQHLS--HE--PTVCPL | 255 |
| HvHsfC1b | AA-----REVCEEEEE-----G-----VRGTIEAVQRLRDERRGMEEELQAMDRRLRAAENRPGQMMAFGLKLADDPGVVLRAMVAKKEE                |        | -----LAAAG                          | 196 |
| OsHsfC1b | PG-----RELCEEGEE-----C-----RELCEEGEE-----VRGTIEAVQRLRREEQGMEEELQAMDQRLRAAERSRPGQMMAFGLKLADDPGVVLRAMVAKKEE |        | -----LAAAG                          | 201 |
| HvHsfC2a | AR-----RPSKDDHAEDS-----SSAMLAMEVMRLKQEQRATEERVAAMWRRVQDAERRPKMLAFLKVVGD                                   |        | P-DVLRRLMGSSS-----DAGLF             | 189 |
| OsHsfC2a | GG-----AKRKEEAGCGGGGEEAAGDVDEESAVVALEVARLRREQREIEGRVAMWRRVQETERRPKMLAFLKVVGD                              |        | P-QVLRRLVDRDNT-----NAAAS            | 201 |
| HvHsfC2b | GG-----KRKDAAADLTG-----DMTMTVATEVVRVLRKEQSTIDDRVAMWRRVQETERRPKMLAFLKVVGD                                  |        | P-DTLQRLVANSN-----AASGD             | 194 |
| OsHsfC2b | GGGG-----GGGKRRDASADGGGG-----GDEDMTMTVATEVVRVLRKEQRTIDDRVAMWRRVQETERRPKMLAFLKVVGD                         |        | P-DKLHRLVGGGGNGNAA-----TAAAD        | 205 |

|          |                                                                                         |  |     |
|----------|-----------------------------------------------------------------------------------------|--|-----|
| HvHsfC1a | Q---PAPSP---PPP-PLLALG-----DAAMGGVVRW-QWAEP-----IPLK-----LTTFEQPSASS---GVQQVPEFE        |  | 294 |
| OsHsfC1a | P---PAPP---QPPQPLLALG-----AAAMDGTYYW-TTEHHHHHHQMKPMT-VLPSLEPPTASC---GVHQVPELGGGGVGLT    |  | 348 |
| HvHsfC1b | A---GGMDP---RPD-KRRRIGA-----EAEEA---AQR-----AVPFPFS---NAGHVY                            |  | 235 |
| OsHsfC1b | N---NGSD---PC-KRRRIGA-----DTGRGGVATG-GDAEM---AQR-----TVPFPFS---VLGVVY                   |  | 250 |
| HvHsfC2a | P---GDGAEF---KRPRLLDG-----EVHVGMKMRVDG-----DGLMYGDRDQDVVREPGADFAGFYTGDDGFS--DVPVDDPP    |  | 266 |
| OsHsfC2a | N---ADDSAVHHQVPRPRLLDSSSTTTTHGDRHLVTAADGFYAGGCGPEAAAAAFAVPPDAVDFTGLYTGDDGFG--NAVVDAGVDY |  | 298 |
| HvHsfC2b | Q---EPVEG---GEKRARLLDG-----DFGNVSAFGP-DAVDFAGFYADGDAFANVVPVVEAAGSGGGGAGCSFAFGVDSGY      |  | 266 |
| OsHsfC2b | NGFADAARAGCGEKRARLLDG-----D---NTGAFGP-DAVDFAGFYTGADMF--DVAVDAAAAAGGSAGCSFAFGVDSGY       |  | 278 |
