# Supplementary material for: Unraveling Regulation of the Small Heat Shock Proteins by the Heat Shock Factor HvHsfB2c in Barley: Its Implications in Drought Stress Response and Seed Development
Source: PubMed Central journal article supplement (PMC3942355; doi:10.1371/journal.pone.0089125), 2014-03-04

Figure S3

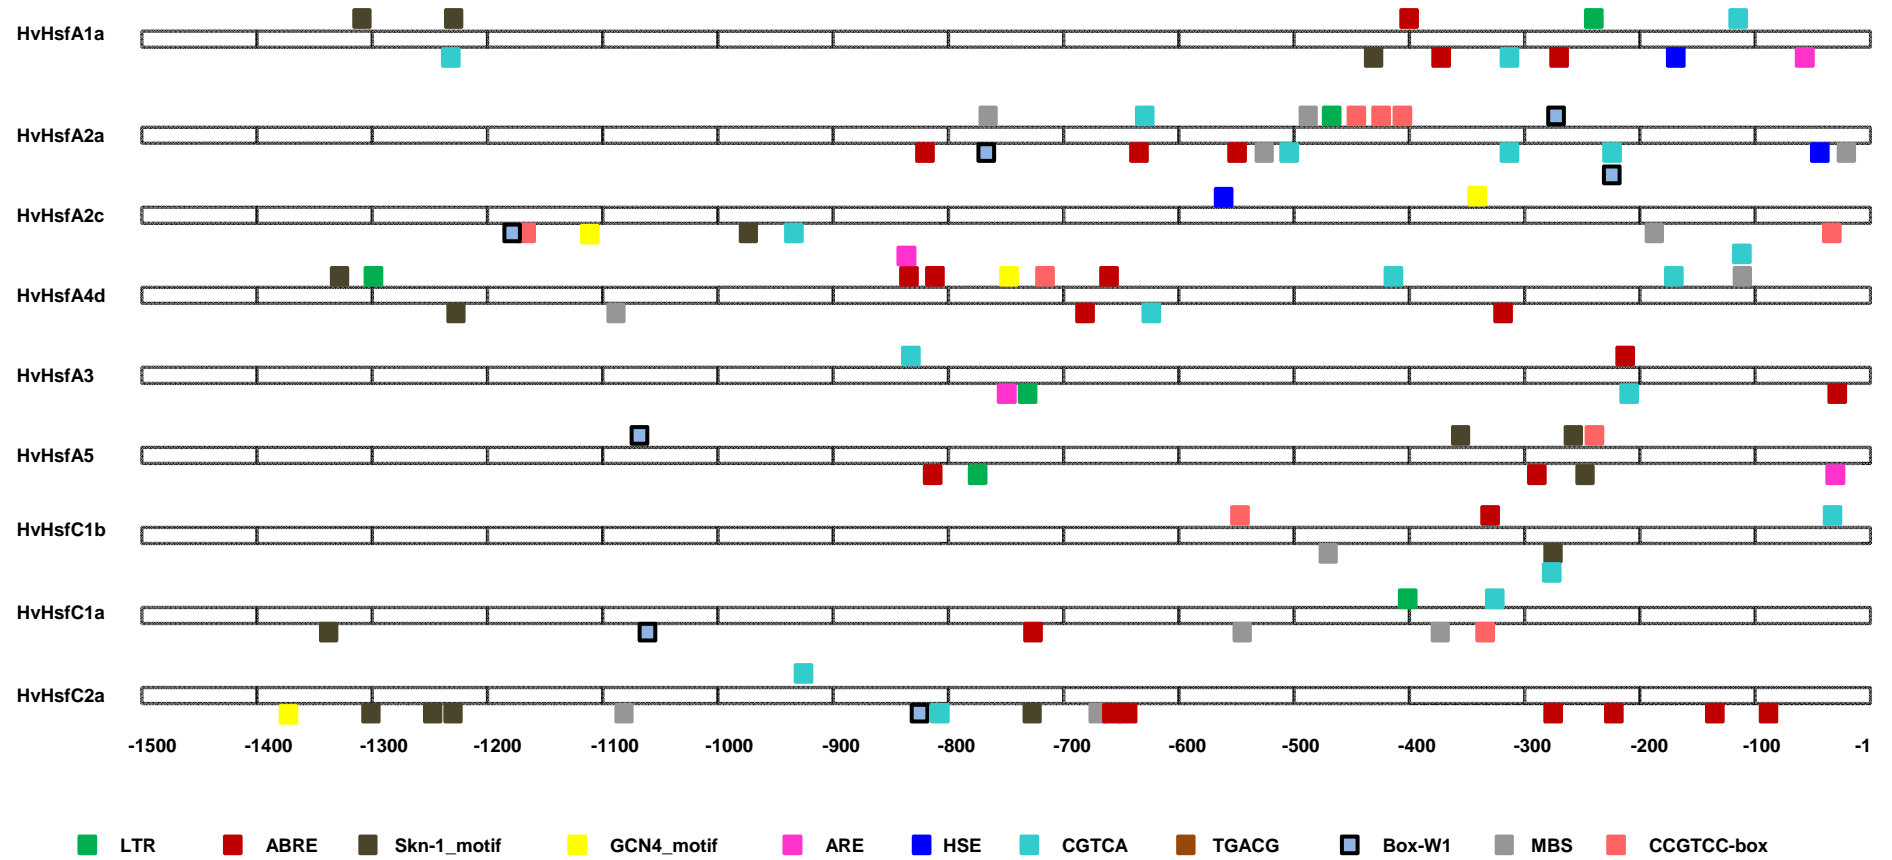

Supplement: pone.0089125.s003.pdf [file pone.0089125.s003.pdf]
