# Supplementary material for: Unraveling Regulation of the Small Heat Shock Proteins by the Heat Shock Factor HvHsfB2c in Barley: Its Implications in Drought Stress Response and Seed Development
Source: PubMed Central journal article supplement (PMC3942355; doi:10.1371/journal.pone.0089125), 2014-03-04
Supplement: pone.0089125.s005.pdf [file pone.0089125.s005.pdf]

**A**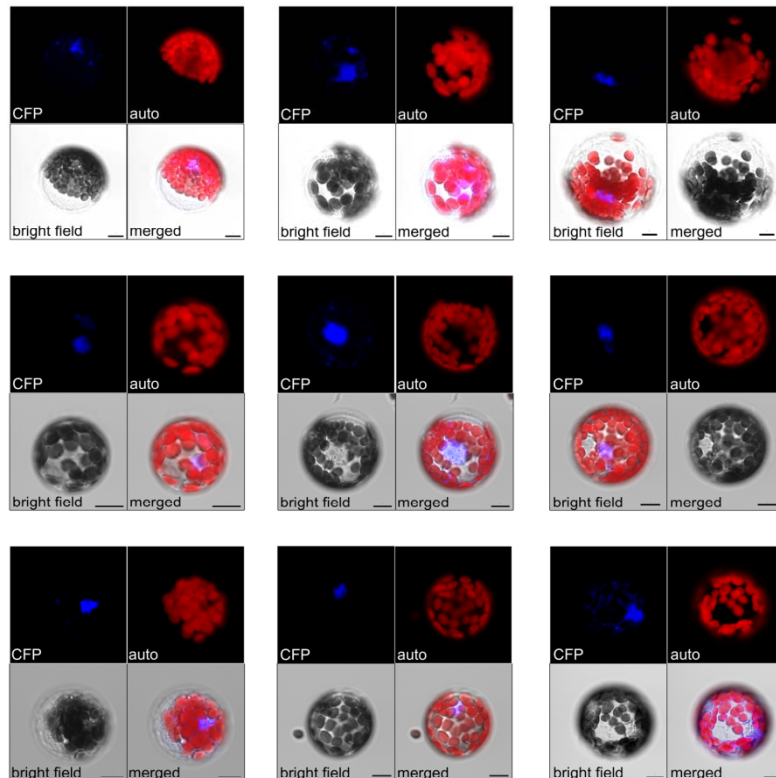**B**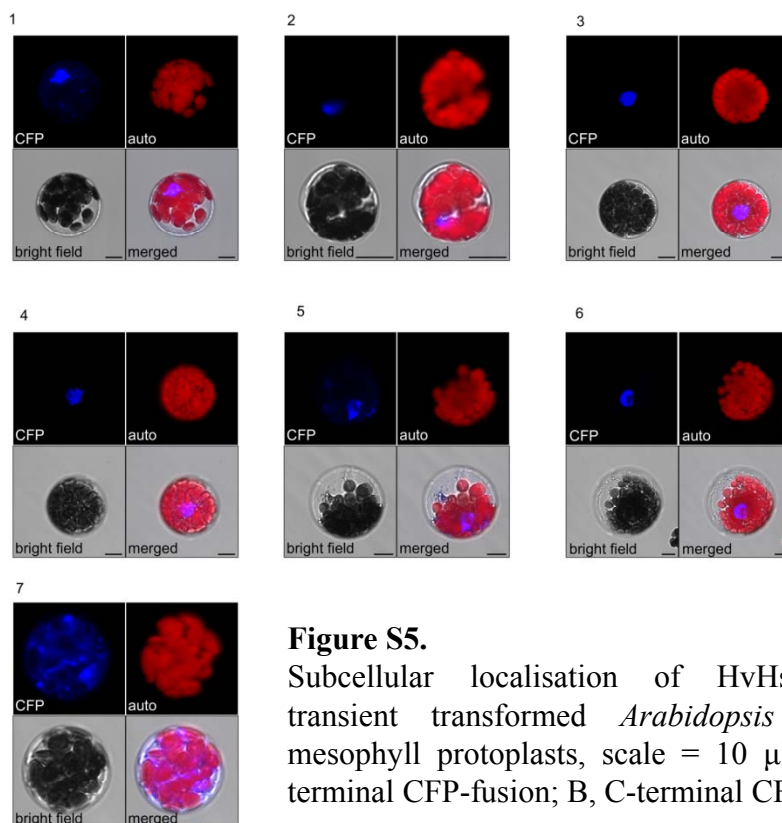**Figure S5.**

Subcellular localisation of HvHsfB2c in transient transformed *Arabidopsis thaliana* mesophyll protoplasts, scale = 10  $\mu$ M. A, N-terminal CFP-fusion; B, C-terminal CFP fusion.
