# Supplementary material for: Unraveling Regulation of the Small Heat Shock Proteins by the Heat Shock Factor HvHsfB2c in Barley: Its Implications in Drought Stress Response and Seed Development
Source: PubMed Central journal article supplement (PMC3942355; doi:10.1371/journal.pone.0089125), 2014-03-04
Supplement: pone.0089125.s006.pdf [file pone.0089125.s006.pdf]

**Table S1. Barley sHsp and Hsf Orthologus genes in Arabidopsis**

| S.No | Query sequence | Subject sequence                 | Description of subject                                                 | Identity      |
|------|----------------|----------------------------------|------------------------------------------------------------------------|---------------|
| 1    | HvHsp16.9-CI   | At5g59720                        | HSP18.2 (Heat shock protein 18.2)                                      | 87/150 (58%)  |
| 2    | HvHsp16.88-CI  | At5g59720                        | HSP18.2 (Heat shock protein 18.2)                                      | 89/150 (59%)  |
| 3    | HvHsp26.8-P    | At4g27670                        | HSP21 (heat shock protein 21)                                          | 99/198 (50%)  |
| 4    | HvHsp19.0-CIII | At1g54050                        | Unknown protein                                                        | 56/120 (46%)  |
| 5    | HvHsp17.76-CIX | At5g59720                        | HSP18.2 (Heat shock protein 18.2)                                      | 45/123 (36%)  |
| 6    | HvHsp17.1CV    | At3g46230                        | AtHSP17.4                                                              | 43/86 (50%)   |
| 7    | HvHsp19.2-CX   | At3g46230                        | AtHSP17.4                                                              | 62/155 (40%)  |
| 8    | HvHsp16.7-CI   | At5g59720                        | HSP18.2 (Heat shock protein 18.2)                                      | 91/149 (61%)  |
| 9    | HvHsp21.3-MI   | At4g25200                        | AtHsp23.6-mito (Mitochondrion-localized small heat shock Protein 23.6) | 77/220 (35%)  |
| 10   | HvHsp17.5-CI   | At3g46230                        | ATHSP17.4                                                              | 77/117 (65%)  |
| 11   | HvHsp17.7-CI   | At3g46230                        | ATHSP17.4                                                              | 93/167 (55%)  |
| 12   | HvHsp17.7-CII  | At5g12030                        | AT-HSP17.6A                                                            | 71/154 (46%)  |
| 13   | HvHsp17.77-CII | At5g12030                        | AT-HSP17.6A                                                            | 79/154 (51%)  |
| 14   | HvHsp21.2      | At1g54400                        | unknown protein                                                        | 32/68 (47%)   |
| 15   | HvHsp17.3-CII  | At5g12030                        | AT-HSP17.6A                                                            | 71/151 (47%)  |
| 16   | HvHsp-ER       | At5g12030                        | AT-HSP17.6A                                                            | 20/54 (37%)   |
| 17   | HvHsp          | No significant hit were obtained |                                                                        |               |
| 18   | HvHsp15.1-Px   | At5g37670                        | unknown protein                                                        | 66/143 (46%)  |
| 19   | HvHsp16.86-CI  | At5g59720                        | HSP18.2 (Heat shock protein 18.2)                                      | 85/150 (56%)  |
| 20   | HvHsp21.9-ER   | At4g10250                        | ATHSP22.0                                                              | 65/148 (43%)  |
| 21   | HvHsfA5        | At4g13980_2                      | probable heat shock transcription factor - Arabidopsis thaliana.       | 184/454 (40%) |
| 22   | HvHsfB2b       | At4g11660                        | AT-HSFB2B; transcription factor                                        | 141/380 (37%) |
| 23   | HvHsfA4d       | At4g18880                        | AT-HSFA4A; DNA binding / transcription factor                          | 160/440 (36%) |
| 24   | HvHsfA4b       | At4g18880                        | AT-HSFA4A; DNA binding / transcription factor                          | 165/442 (37%) |
| 25   | HvHsfC1b       | At3g24520                        | AT-HSFC1; DNA binding / transcription factor                           | 85/182 (46%)  |
| 26   | HvHsfB2c       | At4g11660                        | AT-HSFB2B; transcription factor                                        | 85/101 (84%)  |
| 27   | HvHsfA2d       | At3g22830                        | AT-HSFA6B; DNA binding / transcription factor                          | 98/266 (36%)  |
| 28   | HvHsfC2b       | At3g24520                        | AT-HSFC1; DNA binding / transcription factor                           | 94/193 (48%)  |
| 29   | HvHsfA1a       | At3g02990                        | ATHSFA1E; DNA binding / transcription factor                           | 211/496 (42%) |
| 30   | HvHsfA2a       | At2g26150                        | ATHSFA2; DNA binding / transcription factor                            | 126/218 (57%) |
| 31   | HvHsfA9        | At1g32330                        | heat shock transcription factor family [Arabidopsis thaliana].         | 108/244 (44%) |
| 32   | HvHsfB4c       | At1g46264                        | AT-HSFB4; DNA binding / transcription factor                           | 132/252 (52%) |
| 33   | HvHsfA2c       | At3g22830                        | AT-HSFA6B; DNA binding / transcription factor                          | 172/359 (47%) |

|    |          |           |                                                                |               |
|----|----------|-----------|----------------------------------------------------------------|---------------|
| 34 | HvHsfA3  | At5g03720 | heat shock transcription factor -like protein [Arabidopsis]    | 115/219 (52%) |
| 35 | HvHsfA2b | At3g22830 | AT-HSFA6B; DNA binding / transcription factor                  | 153/251 (60%) |
| 36 | HvHsfA2e | At3g22830 | AT-HSFA6B; DNA binding / transcription factor                  | 164/325 (50%) |
| 37 | HvHsfB2a | At4g11660 | AT-HSFB2B; transcription factor                                | 67/92 (72%)   |
| 38 | HvHsfC1a | At3g24520 | AT-HSFC1; DNA binding / transcription factor                   | 89/202 (44%)  |
| 39 | HvHsfC2a | At3g24520 | AT-HSFC1; DNA binding / transcription factor                   | 94/172 (54%)  |
| 40 | HvHsfA2f | At2g26150 | ATHSFA2; DNA binding / transcription factor                    | 92/175 (52%)  |
| 41 | HvHsfB4b | At1g46264 | AT-HSFB4; DNA binding / transcription factor                   | 145/296 (48%) |
| 42 | HvHsfB1  | At4g36990 | HSF4 (Heat shock factor 4); DNA binding / transcription factor | 98/269 (36%)  |
