# Supplementary material for: Unraveling Regulation of the Small Heat Shock Proteins by the Heat Shock Factor HvHsfB2c in Barley: Its Implications in Drought Stress Response and Seed Development
Source: PubMed Central journal article supplement (PMC3942355; doi:10.1371/journal.pone.0089125), 2014-03-04
Supplement: pone.0089125.s007.pdf [file pone.0089125.s007.pdf]

| ProbesetID            | TranscriptID         |               | Annotation                                                                                                              | MapManTerm | Consensus E   |
|-----------------------|----------------------|---------------|-------------------------------------------------------------------------------------------------------------------------|------------|---------------|
| HVSMEi0006K11r2_at    | bab91939.1           |               | (ap003768) putative nadp dependent malic enzyme [oryza sativa (japonica cultivar_group)]                                | 8.2.10     | 35_961        |
| Contig6860_at         | bab08888.1           |               | gene_id:mij24.6-ref np_013897.1~similar to unknown protein [arabidopsis thaliana]                                       |            | 35,2 35_16191 |
| Contig18997_at        | aam22740.1           |               | (ac092388) putative serine/threonine protein kinase [oryza sativa (japonica cultivar_group)]                            | 29.4.1.57  | 35_7561       |
| rbags10k08_at         | bac15853.1           |               | (ap003746) contains ests d25106(r3184) au184634(r3184)-diphosphonucleotide                                              |            | 35,2 35_8534  |
| HY06D12u_s_at         | hy06d12u_s_at        |               | no annotation                                                                                                           |            | 35,2 35_17271 |
| Contig21187_at        | np_197879.1          |               | (nm_122406) putative protein; protein id: at5g24970.1 [arabidopsis thaliana]                                            | 35.1.1     | 35_24327      |
| HVSMEa0007I03r2_at    | baa95828.1           |               | ests d47168(s12332) d46350(s10967) correspond to a region of the predicted gene.~similar to prunus armeniaca            | 17.5.1     | 35_43599      |
| rbah15i08_s_at        | np_195066.1          |               | dem_like protein; protein id: at4g33400.1 supported by cdna: gi_20465422 [arabidopsis thaliana]                         | 33.99      | 35_18661      |
| HV_CEb0006P16r2_s_at  | hv_ceb0006p16r2_s_at |               | no annotation                                                                                                           |            | 35,2 35_4008  |
| Contig8246_at         | aak27799.1           |               | (ac022457) putative amylase [oryza sativa (japonica cultivar_group)]                                                    | 2.2.2.1    | 35_17258      |
| Contig21613_at        | bab89059.1           |               | (ap003290) pdi_like protein [oryza sativa (japonica cultivar_group)]                                                    |            | 35,2 35_25874 |
| Contig15315_at        | aag41776.1           |               | (af212990) ent_kaurene oxidase [cucurbita maxima]                                                                       | 17.6.1.3   | 35_21965      |
| Contig10520_s_at      | np_176898.1          |               | integral membrane protein putative; protein id: at1g67300.1 [arabidopsis thaliana]                                      |            | 34,2 35_4761  |
| Contig7750_at         | np_200309.1          |               | putative protein; protein id: at5g54980.1 [arabidopsis thaliana] dbj bab08777.1 gb aad50013.1~gene_id:mbg8.25~similar   |            | 35,2 35_17906 |
| Contig9045_at         | bab61860.1           |               | p0712e02.24 [oryza sativa (japonica cultivar_group)] dbj bab89906.1 p0700a11.5 [oryza sativa (japonica cultivar_group)] |            | 35,1 35_4008  |
| Contig3892_at         | np_193037.1          |               | putative protein; protein id: at4g13010.1 supported by cdna: 6276. supported by cdna: gi_15028000 supported by          |            | 26,7 35_1404  |
| HV05O23u_at           | hv05o23u_at          |               | no annotation                                                                                                           | 20.2.1     | 35_14861      |
| Contig21251_at        | t10255               |               | nitrite transport protein chloroplast _ cucumber                                                                        |            | 34,13 35_7556 |
| HV_CEA0014A18r2_at    | aag01554.1           | HvHsB2c       | heat shock transcription factor B2c                                                                                     | 27.3.23    | 35_18576      |
| Contig2014_at         | t05739               |               | probable heat shock protein 17 _ barley emb caa45861.1 (x64560) 17 kd heat shock protein [hordeum vulgare subsp. vul    | 20.2.1     | 35_14867      |
| Contig9737_s_at       | aal79714.1           |               | putative senescence_associated protein [oryza sativa]                                                                   | 20.2.3     | 35_3925       |
| Contig3198_at         | contig3198_at        |               | no annotation                                                                                                           |            | 35,2 35_15390 |
| Contig18323_at        | aag13582.1           |               | (ac037425) unknown protein [oryza sativa]                                                                               |            | 35,2 35_8063  |
| HVSMEen0016H11r2_s_at | hvsmen0016h11r2_s_at |               | no annotation                                                                                                           |            | 35,2 35_8063  |
| Contig16980_at        | np_567058.1          |               | auxin_regulated protein; protein id: at3g57810.1 supported by cdna: 101256. supported by cdna: 29384. [arabidopsis      | 29.5.3     | 35_22714      |
| Contig3761_at         | aak26822.1           |               | (af338432) starch branching enzyme iia variant [triticum aestivum]                                                      | 2.1.2.3    | 35_15640      |
| HF21J01r_at           | np_174269.1          |               | (nm_102716) hypothetical protein; protein id: at1g29760.1 [arabidopsis thaliana]                                        |            | 35,2 35_13219 |
| HS06C20u_at           | np_192861.1          |               | putative protein; protein id: at4g11220.1 supported by cdna: 23536. supported by cdna: gi_14334419 supported by         |            | 33,99 35_1261 |
| HS06C20u_s_at         | np_192861.1          |               | putative protein; protein id: at4g11220.1 supported by cdna: 23536. supported by cdna: gi_14334419 supported by         |            | 33,99 35_1261 |
| Contig6802_at         | bab90152.1           |               | calcyclin binding protein_like [oryza sativa (japonica cultivar_group)]                                                 |            | 35,2 35_16153 |
| Contig1381_at         | aaf68995.1           |               | metallothionein [porteresia coarctata]                                                                                  |            | 35,2 35_14134 |
| Contig13656_at        | contig13656_at       |               | no annotation                                                                                                           |            | 35,2 35_4515  |
| Contig15180_at        | np_174785.1          |               | atp_dependent rna helicase putative; protein id: at1g35530.1 [arabidopsis thaliana]                                     | 28.1       | 35_21460      |
| Contig20753_at        | bab92552.1           |               | putative diacylglycerol kinase [oryza sativa (japonica cultivar_group)]                                                 |            | 11,3 35_10001 |
| Contig2008_s_at       | caa69172.1           | HvHsp16.88-CI | 17 kda class i small heat shock protein [hordeum vulgare subsp. vulgare]                                                | 20.2.1     | 35_14863      |
| HB18H23r_s_at         | hb18h23r_s_at        | HvHsp17.5-CI  | heat shock protein 17.5                                                                                                 | 20.2.1     | 35_14859      |
| Contig2006_s_at       | s72544               | HvHsp17.7-CI  | heat shock protein 17.9 _ pearl millet emb caa63903.1 heat shock protein 17.9 [pennisetum glaucum]                      | 20.2.1     | 35_14861      |
| Contig2007_s_at       | caa69172.1           | HvHsp16.88-CI | 17 kda class i small heat shock protein [hordeum vulgare subsp. vulgare]                                                | 20.2.1     | 35_14869      |
| Contig2012_s_at       | s72544               | HvHsp17.7-CI  | heat shock protein 17.9 _ pearl millet emb caa63903.1 heat shock protein 17.9 [pennisetum glaucum]                      | 20.2.1     | 35_14866      |
| HY03K23u_at           | s72544               | HvHsp17.7-CI  | heat shock protein 17.9 _ pearl millet emb caa63903.1 heat shock protein 17.9 [pennisetum glaucum]                      | 20.2.1     | 35_14866      |
| HY10H17u_at           | hy10h17u_at          |               | no annotation                                                                                                           |            | 35,2 35_47455 |
| Contig26505_at        | bac20874.1           |               | (ap005296) putative fiber protein [oryza sativa (japonica cultivar_group)]                                              |            | 35,2 35_21339 |
| Contig10284_at        | np_191190.2          |               | glycosyl hydrolase family 27 (alpha_galactosidase/melibiose); protein id: at3g56310.1 supported by cdna: gi_18377734    | 3.8.2      | 35_18279      |
| Contig3811_at         | t07610               |               | ws176 protein _ rice dbj baa05538.1 wsi76 protein induced by water stress [oryza sativa]                                | 3.1.1.1    | 35_1095       |
| Contig9310_at         | np_191720.1          |               | (nm_116026) putative protein; protein id: at3g61610.1 [arabidopsis thaliana]                                            |            | 3,5 35_17271  |
