# Supplementary material for: Unraveling Regulation of the Small Heat Shock Proteins by the Heat Shock Factor HvHsfB2c in Barley: Its Implications in Drought Stress Response and Seed Development
Source: PLOS journal article supplement (doi:10.1371/journal.pone.0089125), 2014-03-04

Figure S4

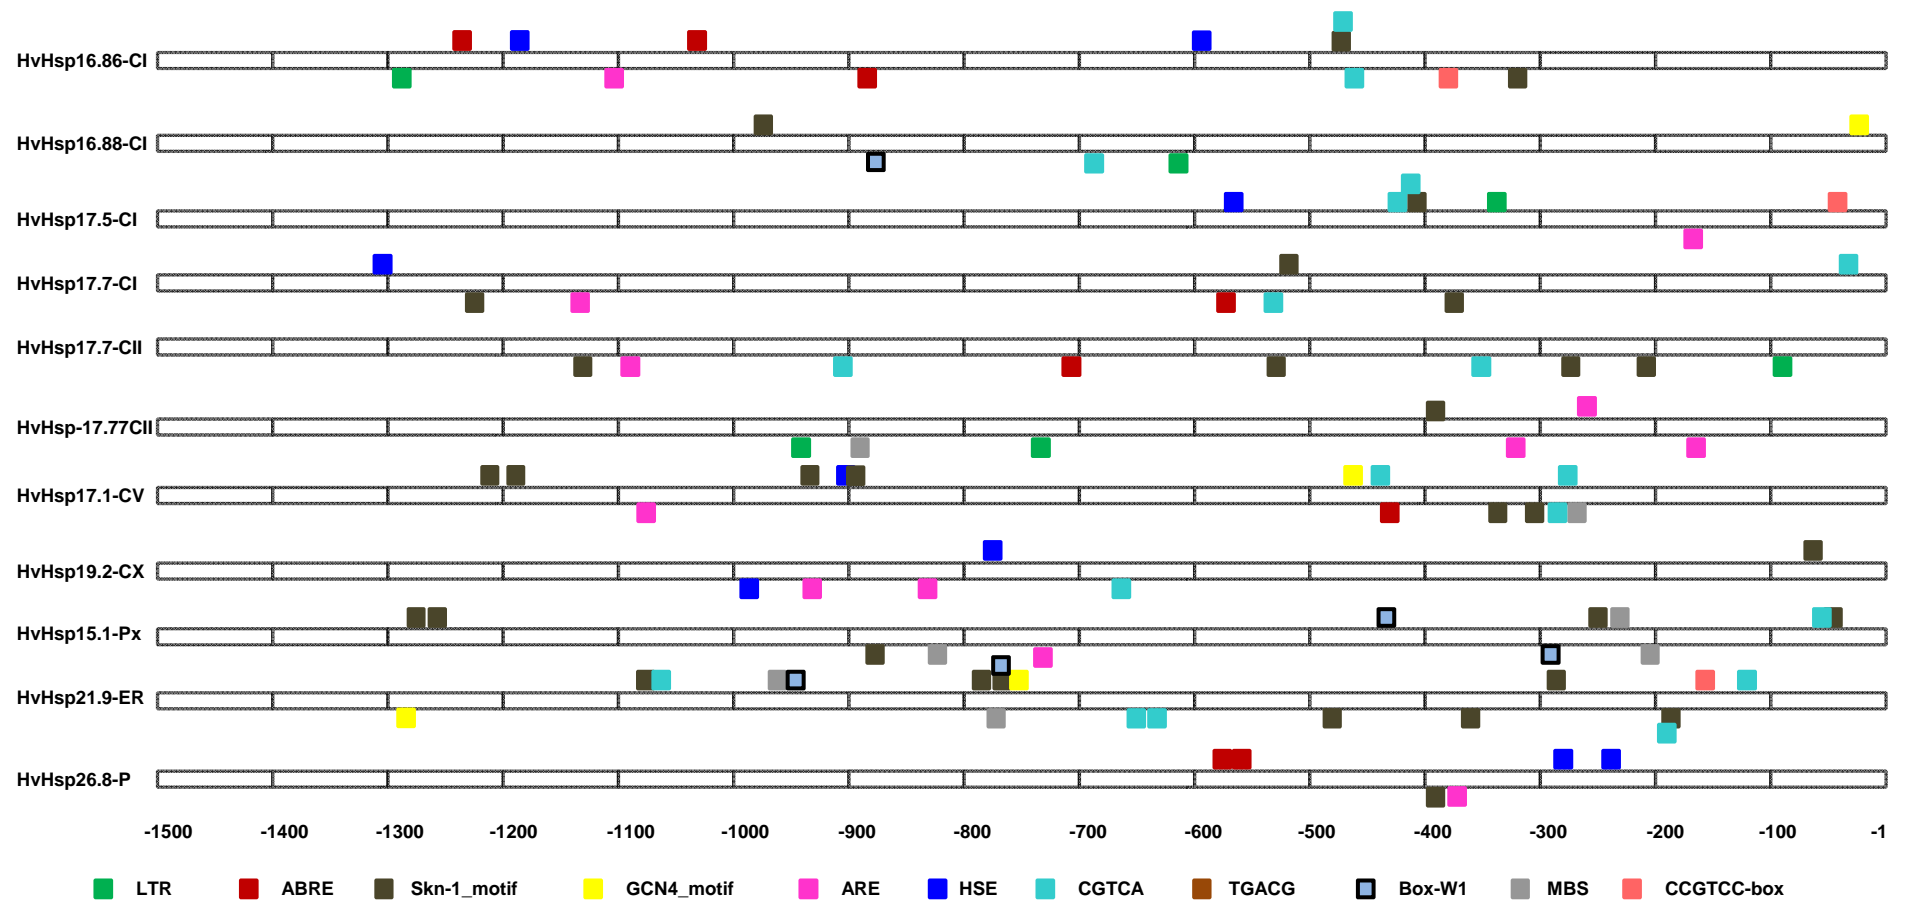

Supplement: S4 (10.1371/journal.pone.0089125.s004) [file journal.pone.0089125.s004]
